# Supplementary material for: Tetracycline prevents Aβ oligomer toxicity through an atypical supramolecular interaction
Source: Royal Society of Chemistry journal article supplement (doi:10.1039/c0ob00303d), 2010-11-10
Supplement: c0ob00303d.pdf [file c0ob00303d.pdf]

# Tetracycline prevents A $\beta$ oligomer toxicity through an atypical supramolecular interaction

**Cristina Airoidi,<sup>a</sup> Laura Colombo,<sup>b</sup> Claudia Manzoni,<sup>b</sup> Erika Sironi,<sup>a</sup> Antonino Natalello,<sup>a</sup> Silvia Maria Doglia,<sup>a</sup> Gianluigi Forloni,<sup>b</sup> Fabrizio Tagliavini,<sup>c</sup> Elena Del Favero,<sup>d</sup> Laura Cantù,<sup>d</sup> Francesco Nicotra\*<sup>a</sup> and Mario Salmona<sup>b</sup>**

<sup>a</sup> Department of Biotechnology and Biosciences, University of Milano-Bicocca, P.zza della Scienza 2, 20126 Milan, Italy. Fax: +390264483565; Tel: +390264482152, E-mail: francesco.nicotra@unimib.it

<sup>b</sup> Department of Molecular Biochemistry and Pharmacology and Department of Neuroscience Mario Negri Institute for Pharmacological Research, Via La Masa 19, 20156 Milan, Italy.

<sup>c</sup> Division of Neurology and Neuropathology, "Carlo Besta" National Neurological Institute, Via Celoria 11, 20133 Milan, Italy.

<sup>d</sup> Department of Chemistry, Biochemistry and Biotechnologies for Medicine, University of Milano, LITA, V. F.lli Cervi, 93, 20090 Segrate, (MI), Italy.

## Supplementary Information

## S1 – NMR Characterization of A $\beta$ 1-40 and A $\beta$ 1-42 assemblie

Figure 2 (main text) shows  $^1\text{H}$ -NMR spectra acquired on the same samples of A $\beta$ 1-40 or A $\beta$ 1-42 in PBS at pH 7.4 or pH 12, 5°C. For both peptides, S/N ratios were higher and  $^1\text{H}$ -NMR signals sharper in the spectrum recorded at pH 12, in agreement with higher relaxation times (Table 1S and 2S). In addition, several differences in proton resonances were seen. These findings are consistent with the diffusion coefficients reported in Table 1 (main text) and demonstrate oligomerization of A $\beta$  peptides at pH 7.4. In addition, they support a higher level of oligomerization for A $\beta$ 1-42 versus A $\beta$ 1-40.

**Table 1S.** T1 values of His residues for A $\beta$ 1-40 and A $\beta$ 1-42 peptide in solution at 5°C, pH 7.4 or pH 12.

| A $\beta$ sequence | pH  | T1 value <sup>[a]</sup> |
|--------------------|-----|-------------------------|
| 1-40               | 7.4 | 1.964 s                 |
| 1-40               | 12  | 3.178 s                 |
| 1-42               | 7.4 | 1.717 s                 |
| 1-42               | 12  | 2.733 s                 |

[a] T1 values were calculated as exponential decay of the average integral of His 6, His 13 and His 14.

**Table 2S.** Selective T1 values of some aromatic signals for A $\beta$ 1-40 and A $\beta$ 1-42 peptide in solution at 5°C, pH 7.4 or pH 12.

| A $\beta$ sequence | pH  | signal       | selT1 value <sup>[a]</sup> |
|--------------------|-----|--------------|----------------------------|
| 1-40               | 7.4 | His (2H)     | 0.680 s                    |
|                    |     | His (4H)     | 0.569 s                    |
|                    |     | Tyr (3H, 5H) | 0.469 s                    |
| 1-40               | 12  | His (2H)     | 1.734 s                    |
|                    |     | His (4H)     | 1.385 s                    |
|                    |     | Tyr (3H, 5H) | 1.143 s                    |
| 1-42               | 7.4 | His (4H)     | 0.296 s                    |
|                    |     | His (4H)     | 0.307 s                    |
|                    |     | Tyr (3H, 5H) | 0.249 s                    |
| 1-42               | 12  | His (4H)     | 1.042 s                    |
|                    |     | His (4H)     | 0.866 s                    |
|                    |     | Tyr (3H, 5H) | 0.896 s                    |

[a] Selective T1 values were calculated as exponential decay of isolated signal from the aromatic region of A $\beta$  peptide  $^1\text{H}$  spectra.

Figure 1S reports DOSY spectra obtained for peptide A $\beta$ 1-40, pH 7.4, at 5, 25 or 37°C.

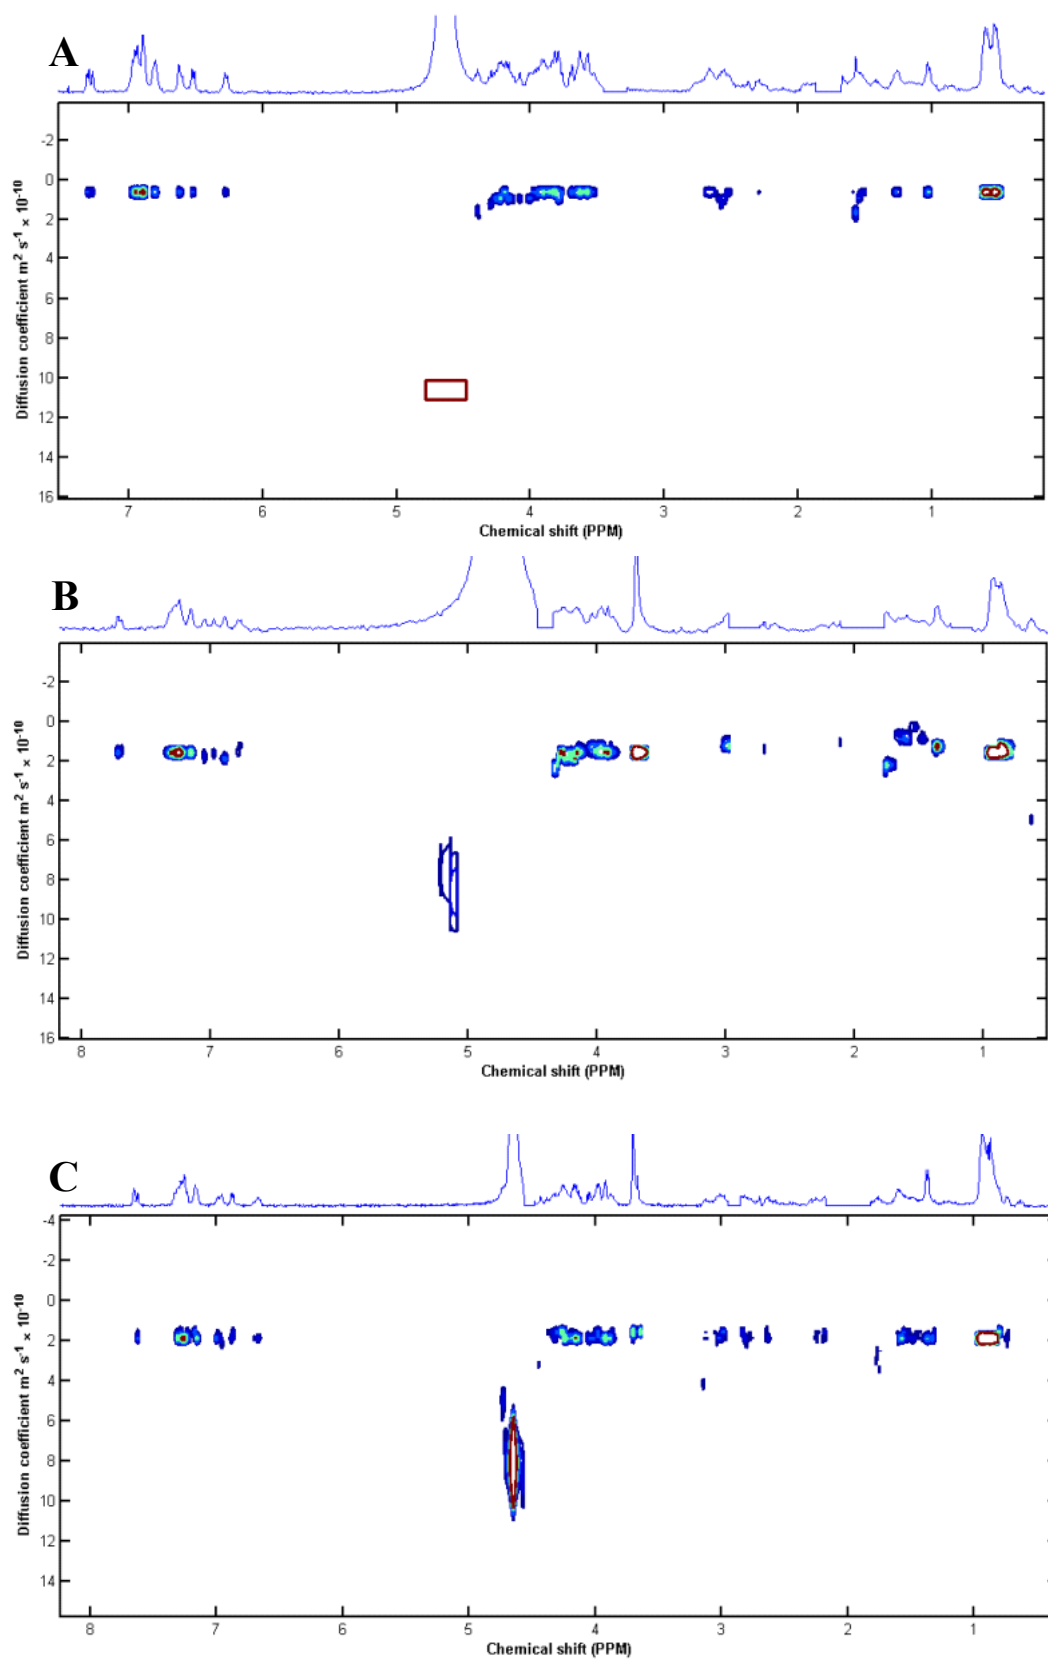

Figure 1S. 2D-DOSY spectra of A $\beta$ 1-40, 0.5 mM, at 5 (A), 25 (B) or 37°C (C), pH = 7.4.

## S2 - A $\beta$ 1-40 and A $\beta$ 1-42 STD-NMR

STD-NMR experiments of A $\beta$  peptide-tetracycline mixtures were carried out for both peptides at different temperatures, at several peptide:drug molar ratios, and with different frequencies for the protein envelope saturation pulse. Peptides dissolved in PBS, pH 7.4, provided clear evidence of tetracycline binding. The first example is shown in Figure 4 (main text); further experiments are illustrated in Figures 2S-6S.

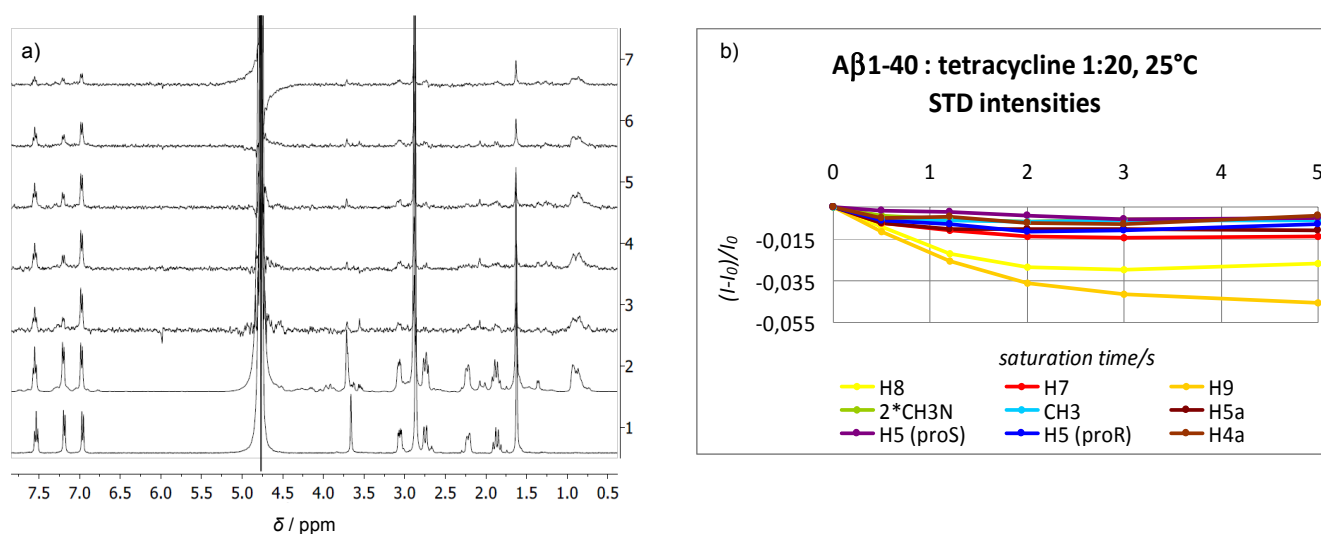

**Figure 2S.** a) <sup>1</sup>H NMR spectra of tetracycline, NS=32 (1), A $\beta$ 1-40-tetracycline mixture, at 1:20 molar ratio, NS=128 (2), STD spectra of the mixture recorded with different peptide saturation times (3, 5 s; 4, 3 s; 5, 2 s; 6, 1.2 s; 7, 0.5 s; enhanced 3x), NS=1792, on-resonance frequency= -1.0 ppm, off-resonance frequency=40 ppm. Spectra 2-7 were recorded on the same sample; all samples were dissolved in PBS, pH 7.4, 25°C. b) Fractional STD effects for each tetracycline proton, calculated by  $(I-I_0)/I_0$ , where  $(I-I_0)$  is the peak intensity in the STD spectrum and  $I_0$  is the peak intensity of an unsaturated reference spectrum.

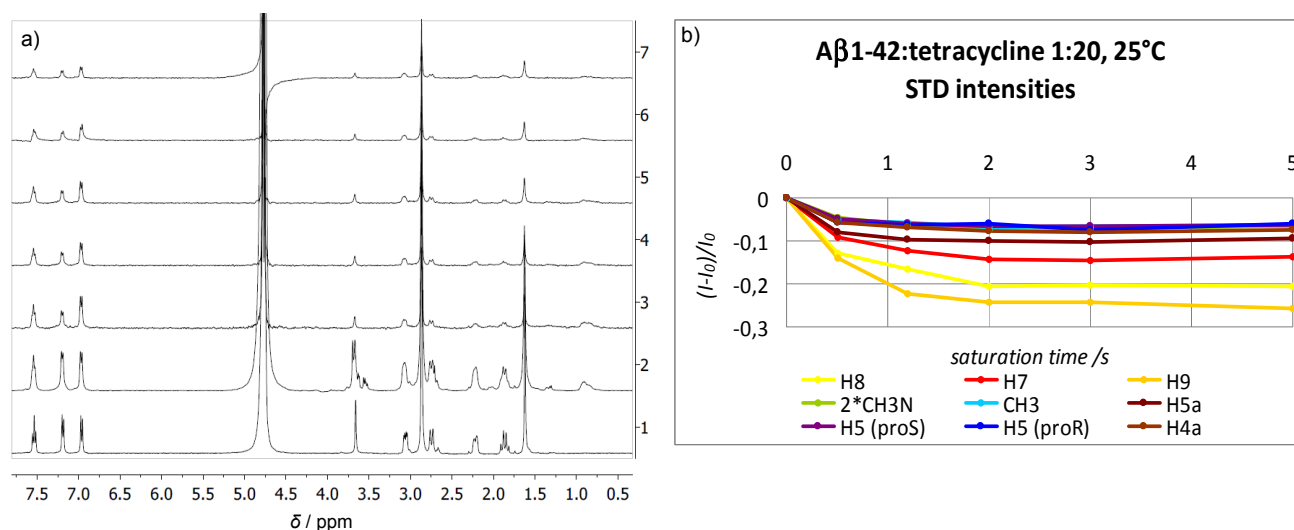

**Figure 3S.** a) <sup>1</sup>H NMR spectra of tetracycline, NS=32 (1), A $\beta$ 1-42-tetracycline mixture, at 1:20 molar ratio, NS=128 (2), STD spectra of the mixture recorded with different peptide saturation times (3, 5 s; 4, 3 s; 5, 2 s; 6, 1.2 s; 7, 0.5 s; enhanced 3x), NS=1792, on-resonance frequency= -1.0 ppm, off-resonance frequency=40 ppm. Spectra 2-7 were recorded on the same sample; all samples were dissolved in PBS, pH 7.4, 25°C. b) Fractional STD effects for each tetracycline proton, calculated by  $(I-I_0)/I_0$ , where  $(I-I_0)$  is the peak intensity in the STD spectrum and  $I_0$  is the peak intensity of an unsaturated reference spectrum.

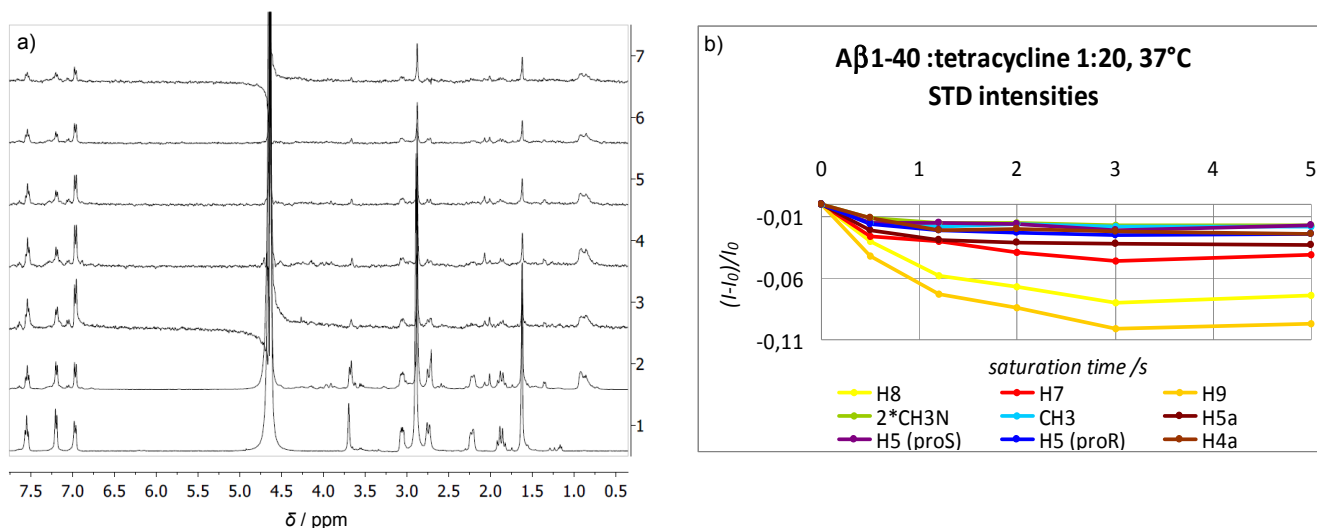

**Figure 4S.** a) <sup>1</sup>H NMR spectra of tetracycline, NS=32 (1), Aβ1-40-tetracycline mixture, at 1:20 molar ratio, NS=128 (2), STD spectra of the mixture recorded with different peptide saturation times (3, 5 s; 4, 3 s; 5, 2 s; 6, 1.2 s; 7, 0.5 s; enhanced 3x), NS=1792, on-resonance frequency= -1.0 ppm , off-resonance frequency=40 ppm. Spectra 2-7 were recorded on the same sample; all samples were dissolved in PBS, pH 7.4, 37°C. b) Fractional STD effects for each tetracycline proton, calculated by  $(I-I_0)/I_0$ , where  $(I-I_0)$  is the peak intensity in the STD spectrum and  $I_0$  is the peak intensity of an unsaturated reference spectrum.

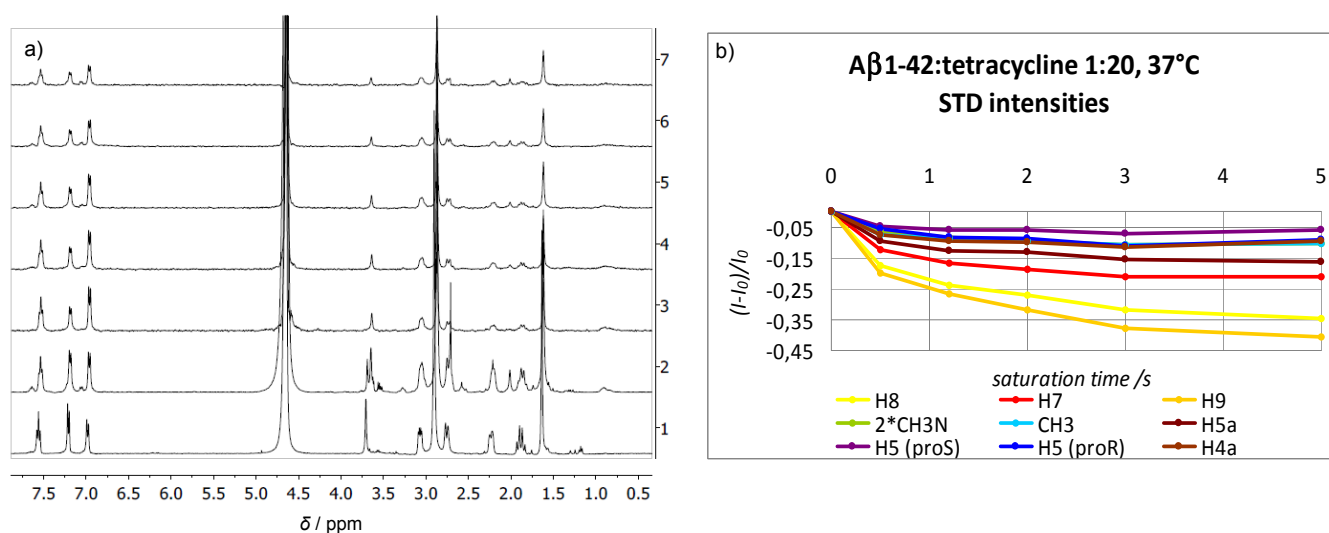

**Figure 5S.** a) <sup>1</sup>H NMR spectra of tetracycline, NS=32 (1), Aβ1-42-tetracycline mixture, at 1:20 molar ratio, NS=128 (2), STD spectra of the mixture recorded with different peptide saturation times (3, 5 s; 4, 3 s; 5, 2 s; 6, 1.2 s; 7, 0.5 s; enhanced 3x), NS=1792, on-resonance frequency= -1.0 ppm, off-resonance frequency=40 ppm. Spectra 2-7 were recorded on the same sample; all samples were dissolved in PBS, pH 7.4, 37°C. b) Fractional STD effects for each tetracycline proton, calculated by  $(I-I_0)/I_0$ , where  $(I-I_0)$  is the peak intensity in the STD spectrum and  $I_0$  is the peak intensity of an unsaturated reference spectrum.

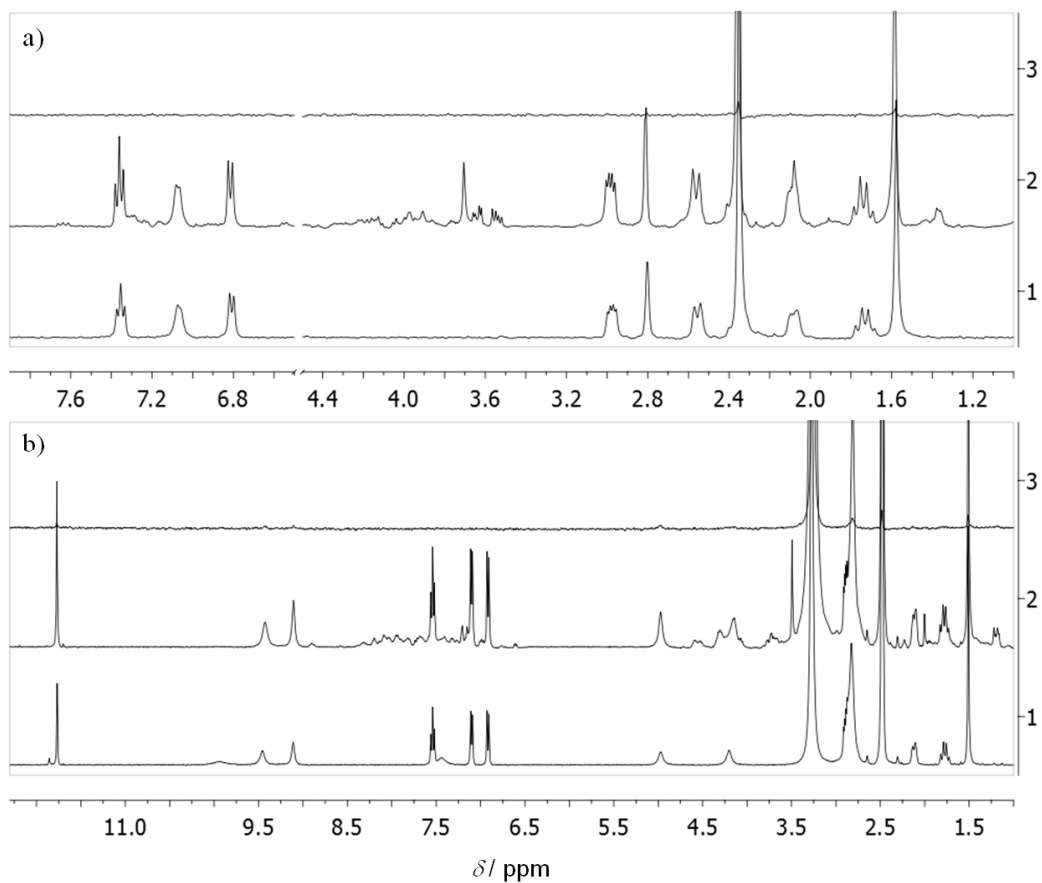

**Figure 6S.** a)  $^1\text{H}$  NMR spectra of tetracycline, NS=32 (1), A $\beta$ 1-40-tetracycline mixture, at a 1:2 molar ratio, NS=128 (2), and STD spectrum of the mixture recorded with saturation times=2 s, NS=512 (3), in PBS, pH 12, 5°C. b)  $^1\text{H}$  NMR spectra of tetracycline NS=32, (1), A $\beta$ 1-40-tetracycline mixture, at a 1:2 molar ratio, NS=128 (2) and STD spectrum of the mixture recorded with saturation times=2s, NS=512 (3) in DMSO, 25°C, on-resonance frequency= -1.0 ppm, off-resonance frequency=40 ppm.

### S3 – Diffusion data deconvolution

The analysis of diffusion experiments acquired on a sample containing A $\beta$ 1-40 and tetracycline (1:2 molar ratio) and performed with SCORE, DECRA and MCR are reported in the following figures (7S-18S). HDO signal region was excluded to avoid complications associated with its spectral overlap with peptide and tetracycline resonances. As expected, the best results were obtained with SCORE. It was possible to separate A $\beta$ 1-40 and tetracycline spectra (and diffusion coefficients, reproducing values obtained with DOSY analysis) by increasing the number of components imposed for the deconvolution; in fact, the best fitting with results produced by DOSY were obtained by SCORE for 5 components. Nevertheless, two of the additional components identified showed diffusion coefficients higher than those calculated for tetracycline and A $\beta$ 1-40, and they clearly could not represent the oligomer diffusion coefficient, while one component presented a negative diffusion spectrum associated with an exponential increase of signal intensities vs the gradient amplitude, and the corresponding spectrum is mostly dominated by noise. We can conclude that this kind of analysis was not effective for the separation of diffusion coefficients of monomers and oligomers.<sup>1</sup>

The following figures (7S-10S) report the deconvolution of diffusion data performed by SCORE for 2, 3, 4 or 5 components.

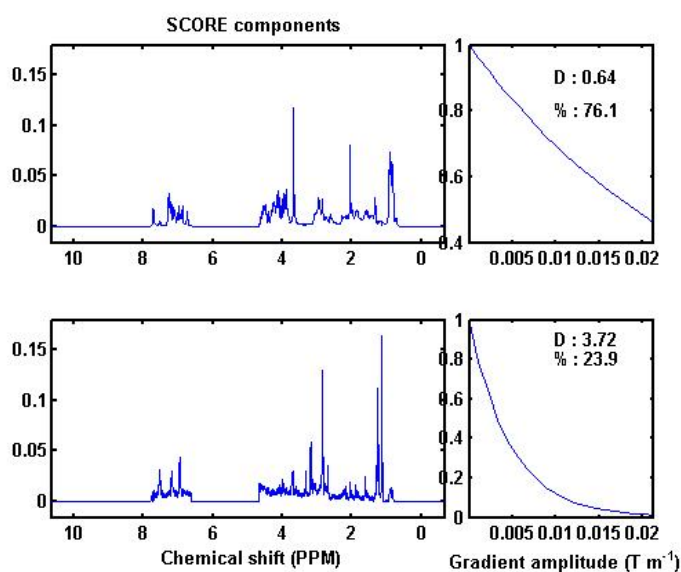

**Figure 7S.** Deconvolution of diffusion data performed by SCORE for 2 components (sample: A $\beta$ 1-40:tetracycline 0.5mM:1mM, pH 7.4, 5°C).

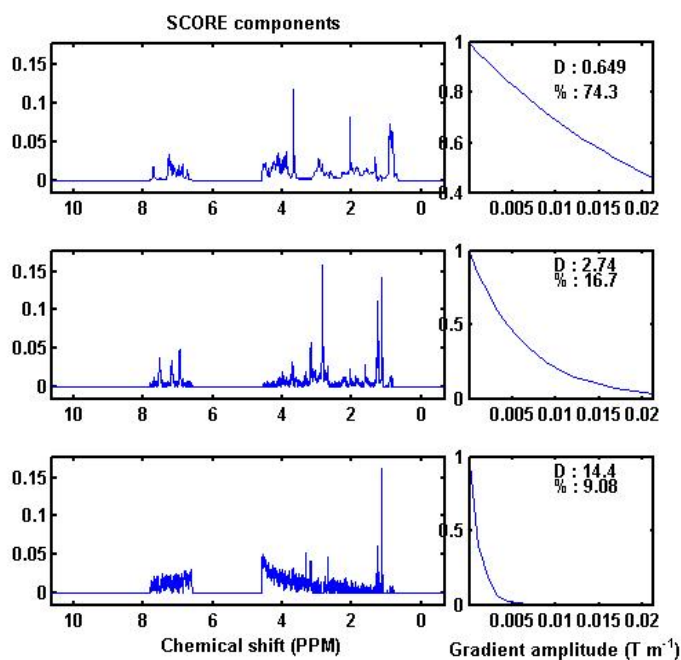

**Figure 8S.** Deconvolution of diffusion data performed by SCORE for 3 components (sample: A $\beta$ 1-40:tetracycline 0.5mM:1mM, pH 7.4, 5°C).

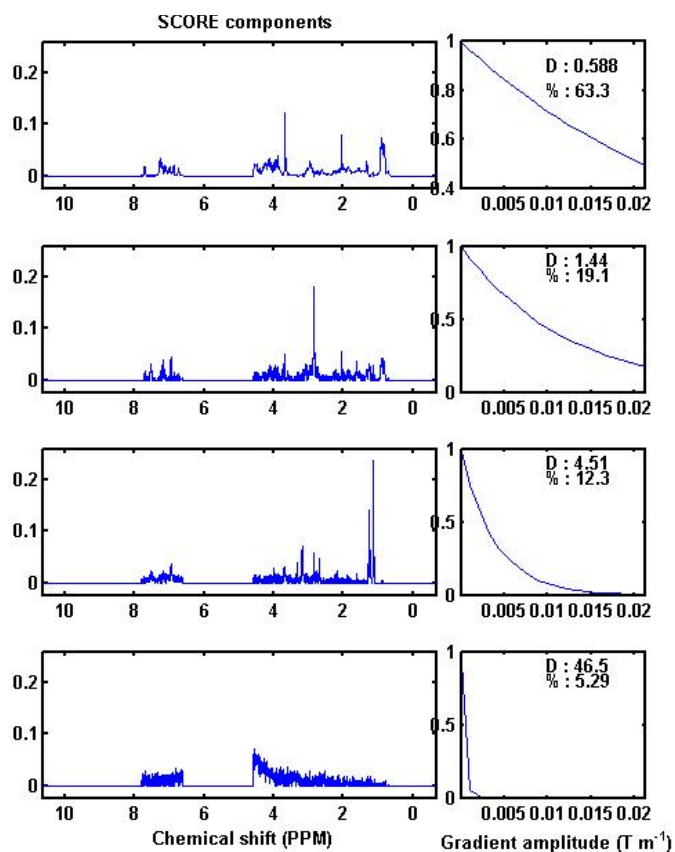

**Figure 9S.** Deconvolution of diffusion data performed by SCORE for 4 components (sample: A $\beta$ 1-40:tetracycline 0.5mM:1mM, pH 7.4, 5°C).

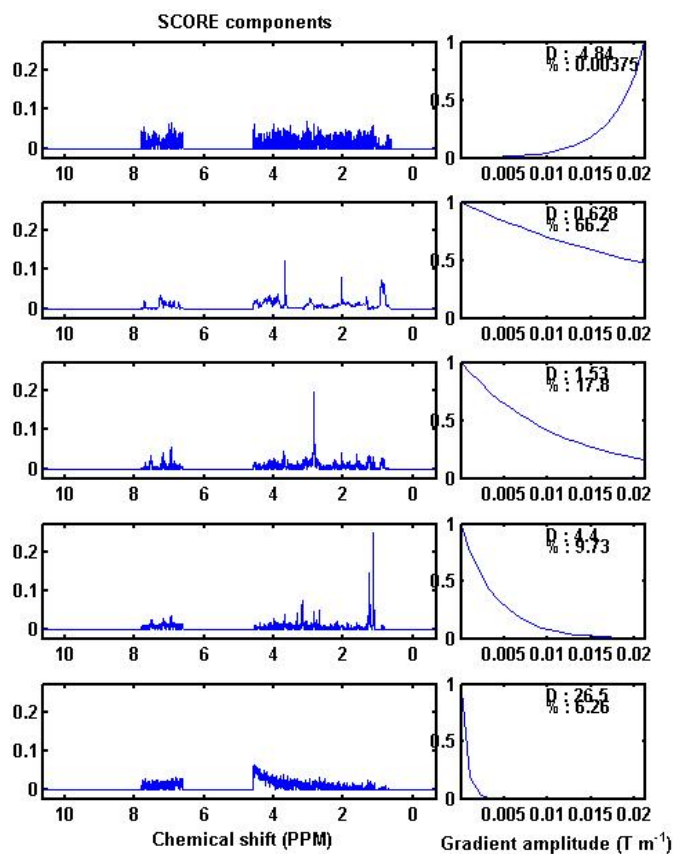



**Figure 10S.** Deconvolution of diffusion data performed by SCORE for 5 components (sample: A $\beta$ 1-40:tetracycline 0.5mM:1mM, pH 7.4, 5°C).

The following figures (11S-14S) report the deconvolution of diffusion data performed by DECRA for 2, 3, 4 or 5 components

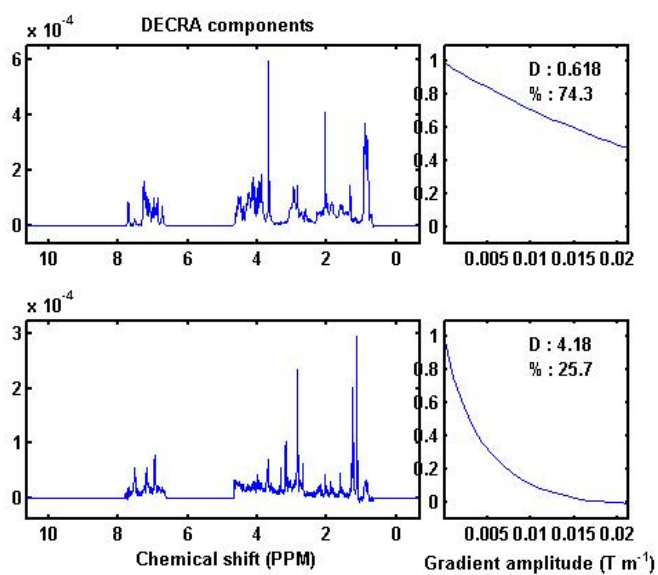

**Figure 11S.** Deconvolution of diffusion data performed by DECRA for 2 components (sample: A $\beta$ 1-40:tetracycline 0.5mM:1mM, pH 7.4, 5°C).

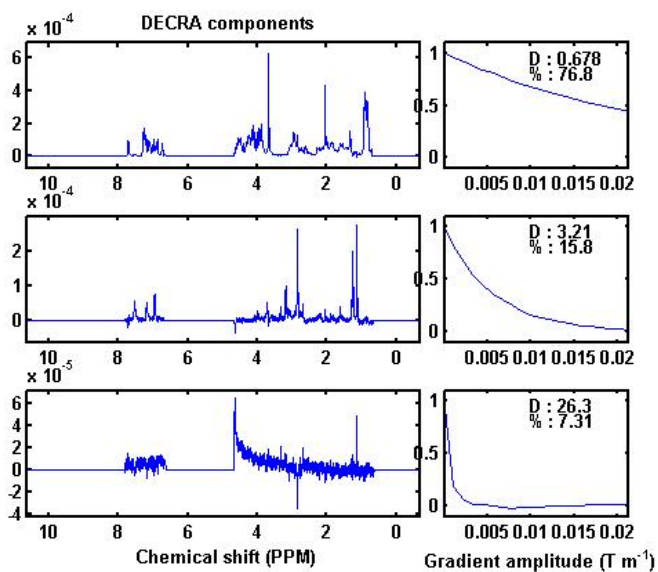

**Figure 12S.** Deconvolution of diffusion data performed by DECRA for 3 components (sample: A $\beta$ 1-40:tetracycline 0.5mM:1mM, pH 7.4, 5°C).

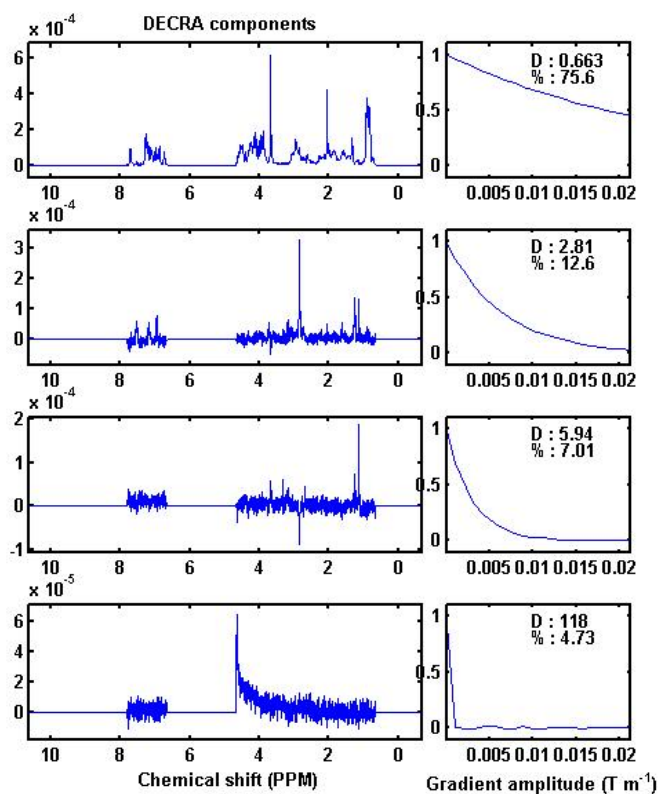

**Figure 13S.** Deconvolution of diffusion data performed by DECRA for 4 components (sample: A $\beta$ 1-40:tetracycline 0.5mM:1mM, pH 7.4, 5°C).

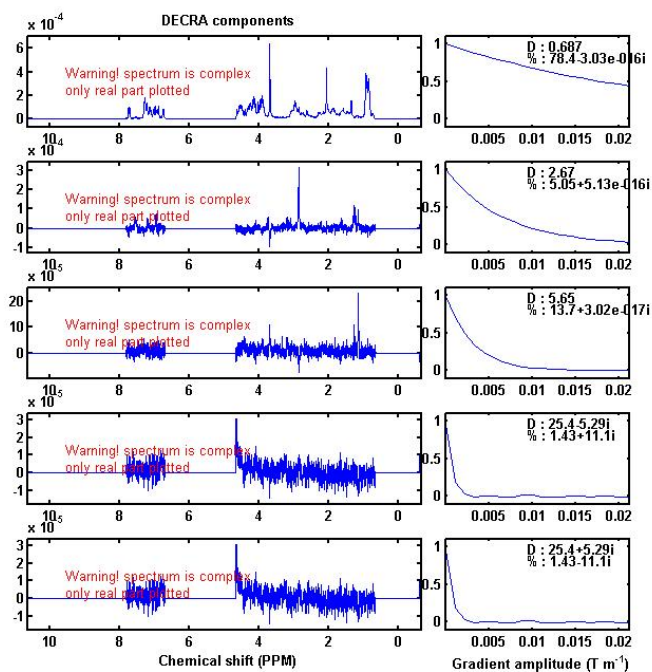

**Figure 14S.** Deconvolution of diffusion data performed by DECRA for 5 components (sample: A $\beta$ 1-40:tetracycline 0.5mM:1mM, pH 7.4, 5°C).

The following figures (15S-18S) report the deconvolution of diffusion data performed by MCR for 2, 3, 4 or 5 components.

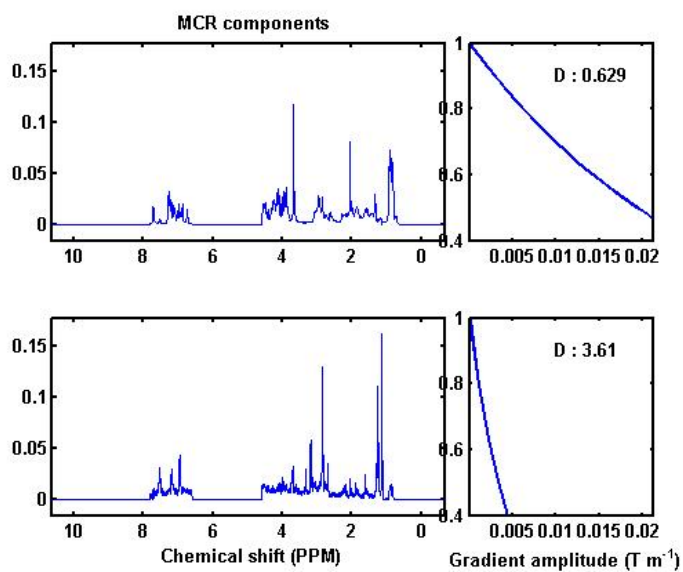

**Figure 15S.** Deconvolution of diffusion data performed by MCR for 2 components (sample: A $\beta$ 1-40:tetracycline 0.5mM:1mM, pH 7.4, 5°C).

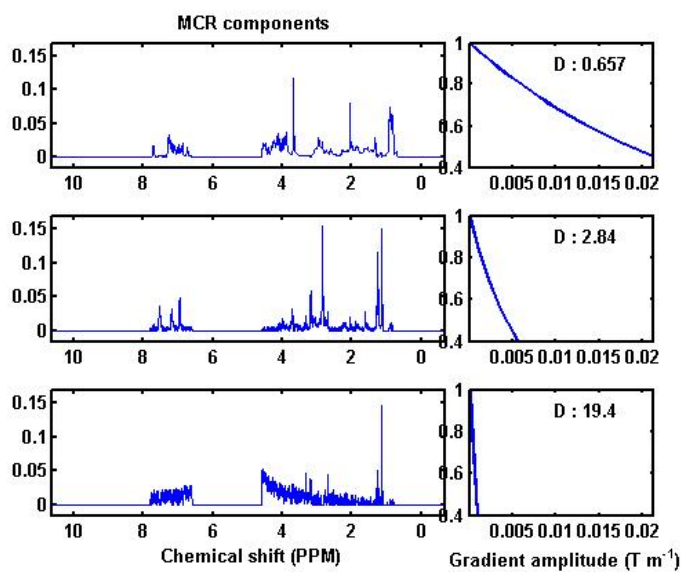

**Figure 16S.** Deconvolution of diffusion data performed by MCR for 3 components (sample: A $\beta$ 1-40:tetracycline 0.5mM:1mM, pH 7.4, 5°C).

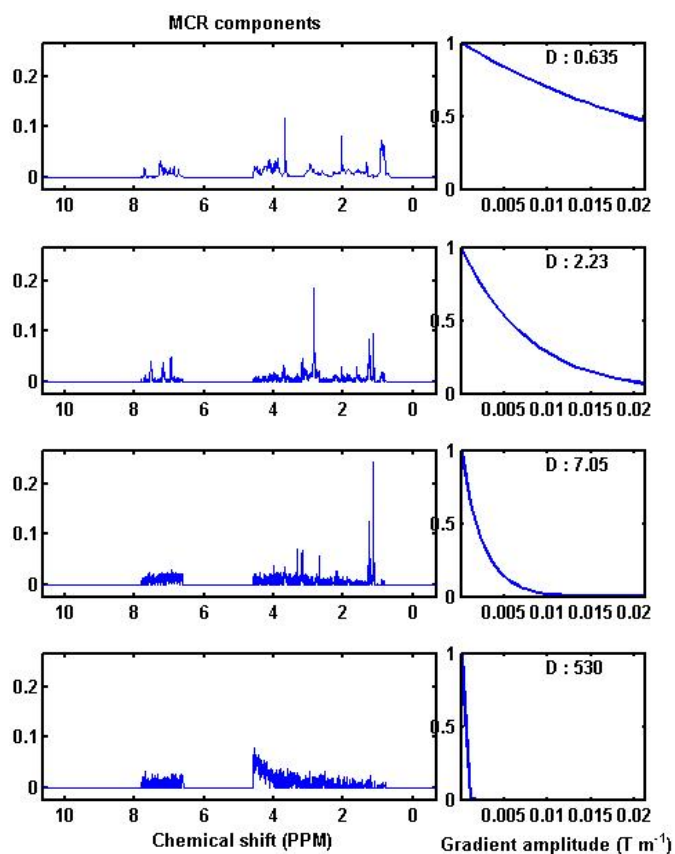

**Figure 17S.** Deconvolution of diffusion data performed by MCR for 4 components (sample:  $\beta$ 1-40:tetracycline 0.5mM:1mM, pH 7.4, 5°C).

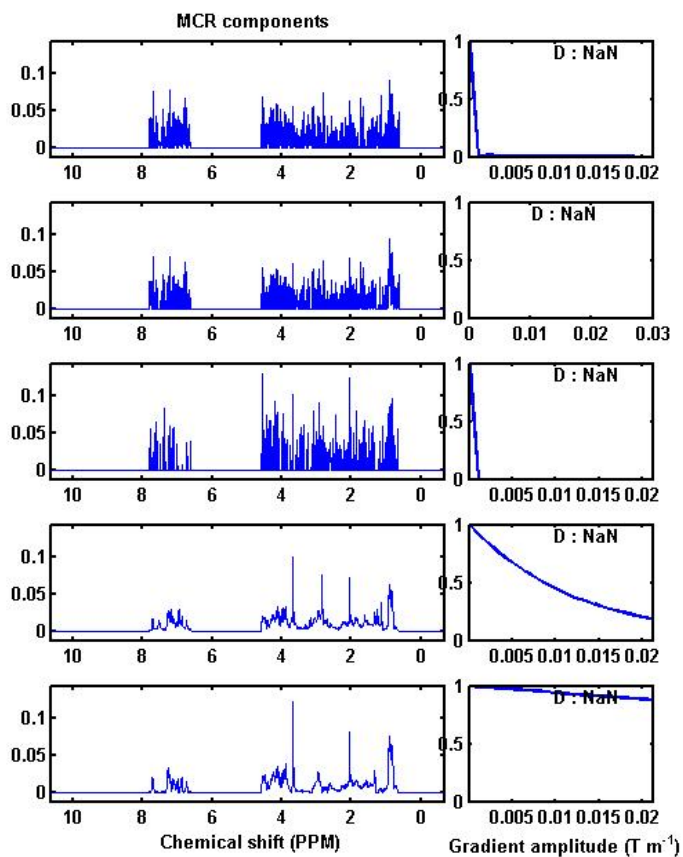

**Figure 18S.** Deconvolution of diffusion data performed by MCR for 5 components (sample: A $\beta$ 1-40:tetracycline 0.5mM:1mM, pH 7.4, 5°C).

#### S4 - A $\beta$ 1-42 trNOESY

trNOESY spectra confirmed tetracycline interaction with both A $\beta$ 1-40 and A $\beta$ 1-42, as deduced by drug cross-peak change of sign (trNOE). Figure 19S-b shows the trNOESY spectrum of A $\beta$ 1-42:tetracycline at a 1:4 molar ratio.

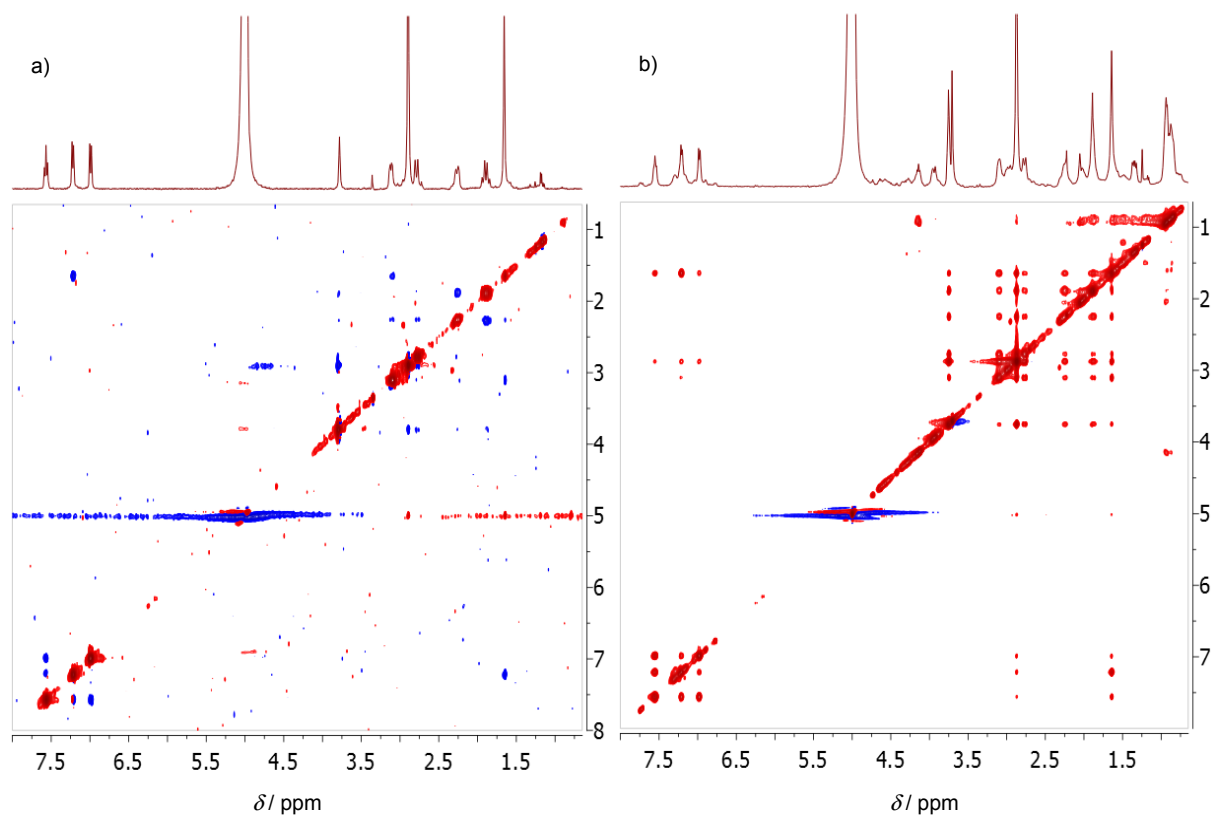

**Figure 19S.** a) 2D-NOESY spectrum of tetracycline, mix 650 ms; b) 2D-NOESY spectrum of A $\beta$ 1-42:tetracycline, at a 1:4 molar ratio, mix 300 ms. Samples were dissolved in PBS, pH 7.4, 5°C.

## S5 - A $\beta$ 1-40 and A $\beta$ 1-42 titration with tetracycline

$^1\text{H}$  titration experiments of A $\beta$ 1-40 and A $\beta$ 1-42 (Figure 20S) were performed to study the chemical shift changes induced in the presence of tetracycline. No significant changes in peptide chemical shifts were observed after tetracycline addition (up to a 1:8 molar ratio). Only a negligible downfield shift of about 0.02 ppm was observed for 2H protons of the three His residues (His6, His13, His14). These data were confirmed by analysis of the corresponding 2D-TOCSY spectra (data not shown).

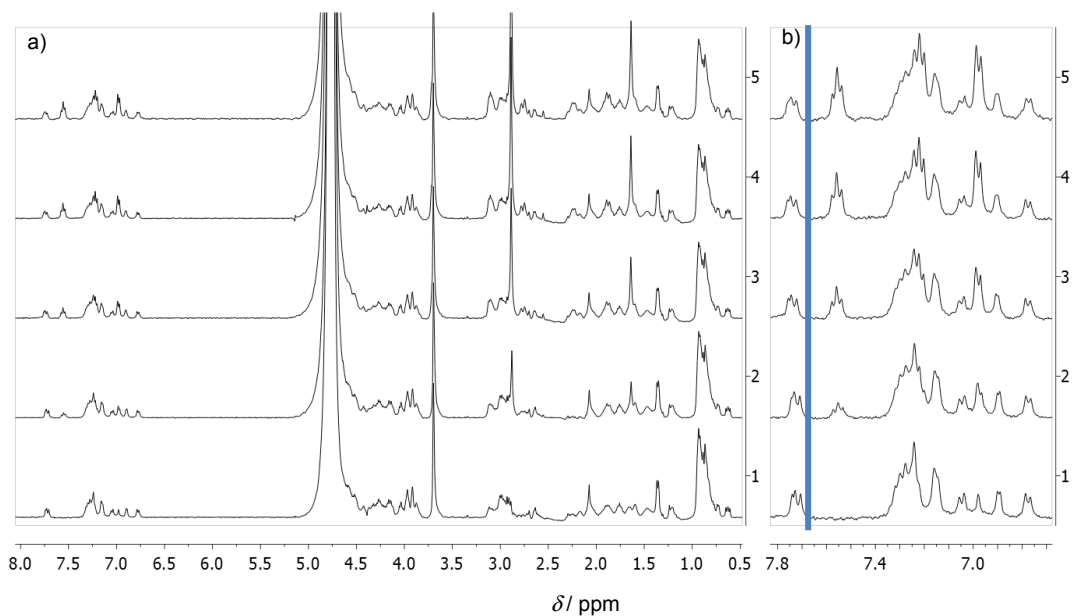

**Figure 20S.** a)  $^1\text{H}$  NMR spectra of A $\beta$ 1-42 (0.25mM) (1), A $\beta$ 1-42-tetracycline mixture, at a 1:1 molar ratio (2), A $\beta$ 1-42-tetracycline mixture, at a 1:2 molar ratio (3), A $\beta$ 1-42-tetracycline mixture, at a 1:3 molar ratio (4), A $\beta$ 1-42-tetracycline mixture, at a 1:4 molar ratio (5). b) Expansion of the 7.9-6.8 ppm region of the spectra reported in (a). NS=128, PBS, pH 7.4, 25°C.

## S6 – CD spectra of A $\beta$ 1-42 in the presence of Tetracycline

The effect of tetracycline on the secondary structures of A $\beta$ 1-42 was studied also by CD in the far-UV region. CD spectra of A $\beta$ 1-42 in the absence and in the presence of tetracycline are almost super imposable and indicate a  $\beta$ -sheet secondary structures,<sup>ii</sup> in agreement with the FTIR results.

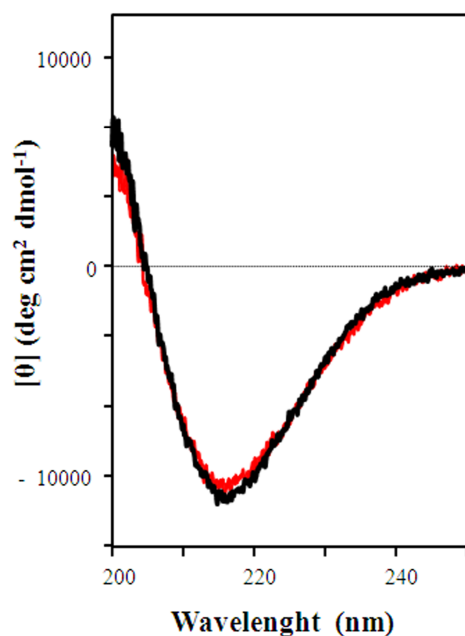

**Figure 21S.** CD spectra of A $\beta$ 1-42 (25  $\mu$ M concentration) in the absence (black) and in the presence of 50  $\mu$ M tetracycline (red). The samples were prepared at 0.25 mM peptide concentration – plus 0.5 mM tetracycline when required- as reported for the other analyses in the paper and diluted of a factor 10 to perform CD measurements.

## S7 – Atomic Force Microscopy. Analysis of aggregate height formed following co-dissolution of A $\beta$ peptides with tetracycline.

The aggregate height was determined with a Research NanoScope 7.20 (Veeco) software after analysis of 50 independent spots in three different areas of 5  $\mu\text{m}^2$  (Figure 22S). Statistical analysis (Tables 3S-5S) was carried out by t-test. A $\beta$ 1-42, time 0, mean and confidence interval, peptide alone 1.56 nm, 1.23-1.90 nm vs peptide-tetracycline 2.94 nm, 2.54-3.34 nm,  $p < 0.0001$ . A $\beta$ 1-42; time 120 h, peptide alone 3.42 nm, 2.76-4.09 nm vs peptide-tetracycline 16.96 nm, 13.99-19.92 nm,  $p < 0.0001$ . A $\beta$ 1-40; time 120 h, peptide alone 0.38 nm, 0.33-0.44 nm vs peptide-tetracycline 1.66 nm, 1.38-1.95 nm,  $p < 0.0001$ .

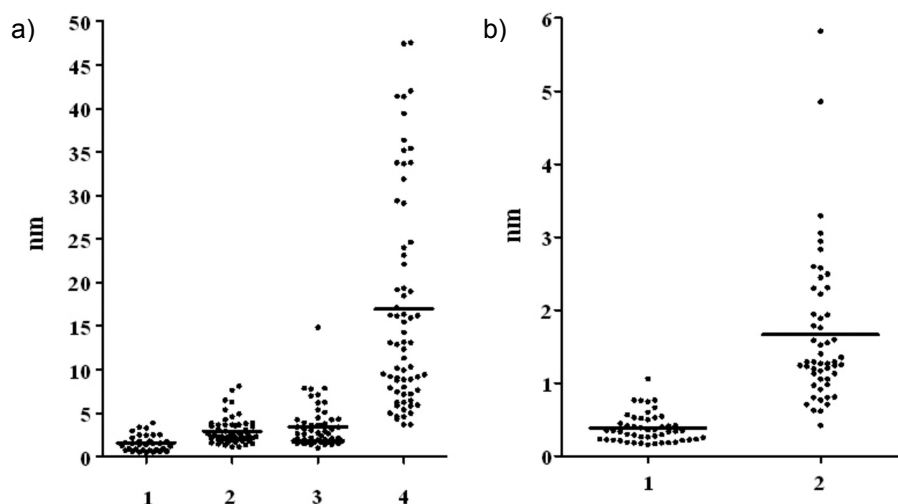

**Figure 22S.** Scattered plot of aggregate height distribution. Panel a. (1) A $\beta$ 1-42 time zero, (2) A $\beta$ 1-42-tetracycline, time zero; (3) A $\beta$ 1-42, time 120 h, (4) A $\beta$ 1-42-tetracycline, time 120 h. Panel b. (1) A $\beta$ 1-40 time 120 h, (2) A $\beta$ 1-40-tetracycline, time 120 h.

|    | Parameter                        | A<br>Value                |
|----|----------------------------------|---------------------------|
|    |                                  | Y                         |
| 1  | Table Analyzed                   | Data 1                    |
| 2  | Column A                         | 1-42 0hrs                 |
| 3  | vs                               | vs                        |
| 4  | Column B                         | 1-42 0hrs tetra           |
| 5  |                                  |                           |
| 6  | Unpaired t test                  |                           |
| 7  | P value                          | $P < 0.0001$              |
| 8  | P value summary                  | ***                       |
| 9  | Are means signif. different? (P) | Yes                       |
| 10 | One- or two-tailed P value?      | Two-tailed                |
| 11 | t, df                            | $t=4.724$ $df=88$         |
| 12 |                                  |                           |
| 13 | How big is the difference?       |                           |
| 14 | Mean $\pm$ SEM of column A       | $1.564 \pm 0.1629$ $N=50$ |
| 15 | Mean $\pm$ SEM of column B       | $2.940 \pm 0.2002$ $N=57$ |
| 16 | Difference between means         | $-1.376 \pm 0.2912$       |
| 17 | 95% confidence interval          | $-1.956$ to $-0.7961$     |
| 18 | R squared                        | 0.2023                    |
| 19 |                                  |                           |
| 20 | F test to compare variances      |                           |
| 21 | F,DFn, Dfd                       | 2.609, 56, 32             |
| 22 | P value                          | 0.0045                    |
| 23 | P value summary                  | **                        |
| 24 | Are variances significantly diff | Yes                       |

**Table 3S.** Statistical analysis (t test) of scattered A $\beta$ 1-42 vs A $\beta$ 1-42-tetracycline, time zero.



|    | Parameter                               | A<br>Value          |
|----|-----------------------------------------|---------------------|
|    |                                         | Y                   |
| 1  | Table Analyzed                          | Data 1              |
| 2  | Column A                                | 1-42 120hrs         |
| 3  | vs                                      | vs                  |
| 4  | Column B                                | 1-42 120hrs tetra   |
| 5  |                                         |                     |
| 6  | Unpaired t test                         |                     |
| 7  | P value                                 | P<0.0001            |
| 8  | P value summary                         | ***                 |
| 9  | Are means signif. different? (P < 0.05) | Yes                 |
| 10 | One- or two-tailed P value?             | Two-tailed          |
| 11 | t, df                                   | t=7.993 df=120      |
| 12 |                                         |                     |
| 13 | How big is the difference?              |                     |
| 14 | Mean ± SEM of column A                  | 3.424 ± 0.3320 N=54 |
| 15 | Mean ± SEM of column B                  | 16.96 ± 1.484 N=68  |
| 16 | Difference between means                | -13.53 ± 1.693      |
| 17 | 95% confidence interval                 | -16.88 to -10.18    |
| 18 | R squared                               | 0.3475              |
| 19 |                                         |                     |
| 20 | F test to compare variances             |                     |
| 21 | F,DFn, Dfd                              | 25.16, 67, 53       |
| 22 | P value                                 | P<0.0001            |
| 23 | P value summary                         | ***                 |
| 24 | Are variances significantly different?  | Yes                 |

**Table 4S.** Statistical analysis (t test) of scattered A $\beta$ 1-42 vs A $\beta$ 1-42-tetracycline, time 120 hours.

|    | Parameter                               | A<br>Value            |
|----|-----------------------------------------|-----------------------|
|    |                                         | Y                     |
| 1  | Table Analyzed                          | Data 1                |
| 2  | Column A                                | 1-40 120hrs           |
| 3  | vs                                      | vs                    |
| 4  | Column B                                | 1-40 120hrs tetra     |
| 5  |                                         |                       |
| 6  | Unpaired t test                         |                       |
| 7  | P value                                 | P<0.0001              |
| 8  | P value summary                         | ***                   |
| 9  | Are means signif. different? (P < 0.05) | Yes                   |
| 10 | One- or two-tailed P value?             | Two-tailed            |
| 11 | t, df                                   | t=8.714 df=100        |
| 12 |                                         |                       |
| 13 | How big is the difference?              |                       |
| 14 | Mean ± SEM of column A                  | 0.3839 ± 0.02781 N=50 |
| 15 | Mean ± SEM of column B                  | 1.664 ± 0.1416 N=52   |
| 16 | Difference between means                | -1.280 ± 0.1470       |
| 17 | 95% confidence interval                 | -1.572 to -0.9885     |
| 18 | R squared                               | 0.4316                |
| 19 |                                         |                       |
| 20 | F test to compare variances             |                       |
| 21 | F,DFn, Dfd                              | 26.94, 51, 49         |
| 22 | P value                                 | P<0.0001              |
| 23 | P value summary                         | ***                   |
| 24 | Are variances significantly different?  | Yes                   |

**Table 5S.** Statistical analysis (t test) of scattered A $\beta$ 1-40 vs A $\beta$ 1-40-tetracycline, time 120 hours.

## S8 – Tetracycline - Thioflavin T competitive binding studies

trNOESY spectra confirmed tetracycline and ThT binding to A $\beta$ 1-40 and A $\beta$ 1-42, as deduced by compound cross-peak change of sign (trNOE) (Figure 23S).

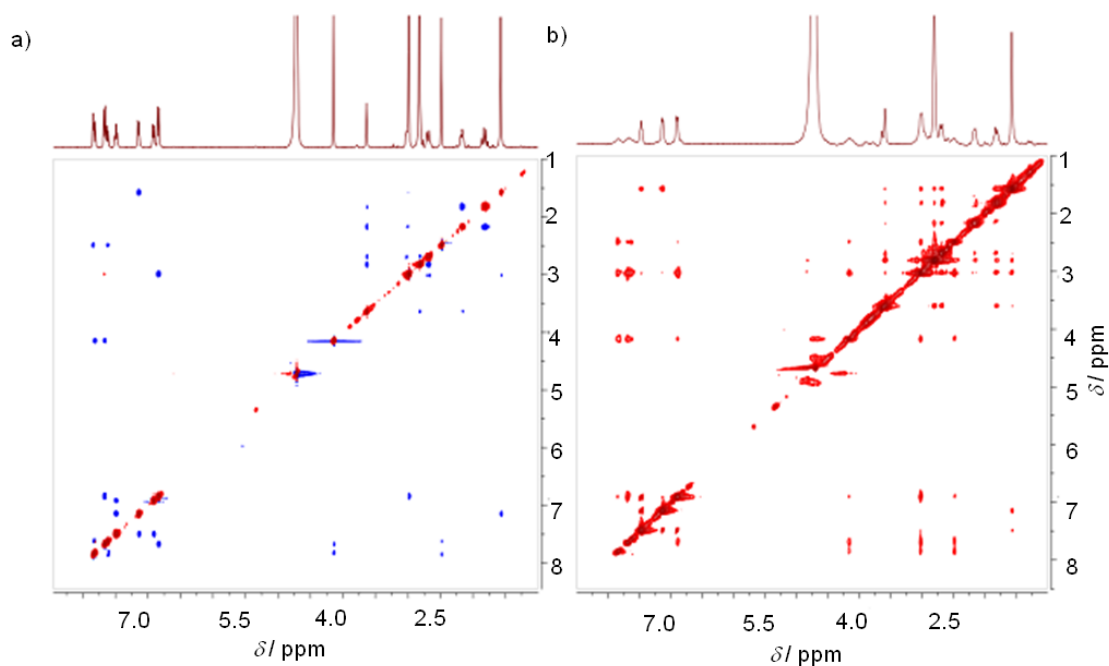

**Figure 23S.** NOESY spectrum of tetracycline:ThT mixture, at a 1:1 molar ratio, mix 800 ms (a), trNOESY of A $\beta$ 1-42:tetracycline:ThT mixture, at tetracycline:ThT 2:1 molar ratio, mix 250 ms b). Peptide:tetracycline at a 1:15 molar ratio. Samples were dissolved in PBS, pH 7.4 25°C.

## S9 – FTIR spectra of A $\beta$ peptides in presence of thioflavin T

The effect of ThT on the structural properties of A $\beta$ 1-40 and A $\beta$ 1-42 was examined by their infrared absorption in the Amide I region. The second derivative spectra of the peptides are reported in Figure 24S in presence and absence of ThT. The spectra are dominated by the two intermolecular  $\beta$ -sheet bands, which are signature of A $\beta$  peptide oligomers (see Results and Discussion in the main text). In addition the spectra display a band around 1,605  $\text{cm}^{-1}$  due to a ThT absorption, reported in the bottom of the figure. It can be seen that ThT does not induce appreciable differences in the intermolecular  $\beta$ -sheet bands of the two peptides, similarly to what observed for tetracycline. Moreover, the FTIR response of ThT around 1605  $\text{cm}^{-1}$  is very similar in the absence and in the presence of A $\beta$  oligomers, displaying only a minor downshift. It seems that this band is not very sensitive to the ThT interaction.

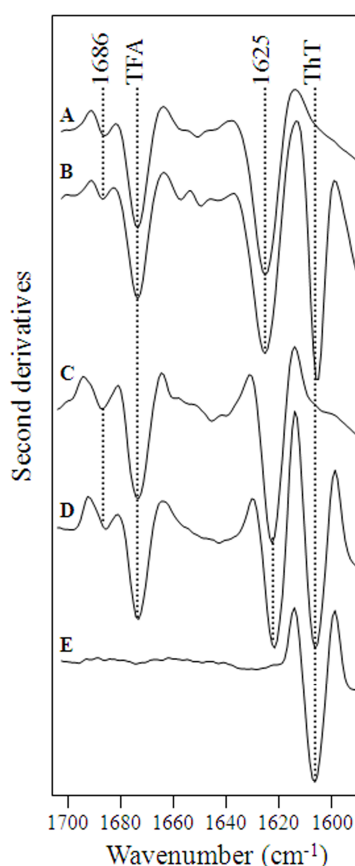

**Figure 24S.** FTIR second derivative spectra of A $\beta$  peptides in presence of ThT. Spectra of A $\beta$ 1-42 (in D<sub>2</sub>O PBS buffer, pH 7.4) in the absence (A) and in the presence (B) of ThT at a 1:4 molar ratio. Spectra of A $\beta$ 1-40 (in D<sub>2</sub>O PBS, pH 7.4) in the absence (C) and in the presence (D) of ThT at a 1:4 molar ratio. The spectrum of free ThT in the same buffer is also reported (E).

<sup>i</sup> a) M. Nillson and G. Morris, *Magn. Reson. Chem.* 2006, **44**, 655–660; b) M. Nillson and G. Morris, *Anal. Chem.* 2008, **80**, 3777–3782; c) M. Nillson and G. Morris, *Journal of Magnetic Resonance* 2009, **200**, 296–302.

<sup>ii</sup> S. M. Kelly, T. J. Jess, N. C. Price, *BBA*, 2005, **1751**, 119–139.
